# Supplementary material for: Impact of a quality improvement programme on the preparation and administration of medications via a nasoenteral feeding tube: 2014–2019 intervention study
Source: PubMed Central journal article supplement — BMJ Open Qual. 2023 Jun 21;12(2):e002183. doi: 10.1136/bmjoq-2022-002183 (PMC10314669; doi:10.1136/bmjoq-2022-002183), 2023-06-21
Supplement: bmjoq-2022-002183supp002.pdf [file bmjoq-2022-002183supp002.pdf]

Supplemental file 2. Descriptive analysis of the measures monitored over time, in patients using a nasoenteral tube (N=366).

| <b>Measures</b>                                                 | <b>2014<br/>n (%)</b> | <b>2015 - 2017<br/>n (%)</b> | <b>2018 - 2019<br/>n (%)</b> | <b>p-value</b> |
|-----------------------------------------------------------------|-----------------------|------------------------------|------------------------------|----------------|
| Number of medications prescribed via tube in 24 hours           | 6 (4.9)               | 6 (5.6)                      | 5 (4.5)                      | *0.0010        |
| Number of medications scheduled for the same time               | 3 (3.3)               | 2 (2.3)                      | 2 (1.3)                      | *0.0010        |
| Time elapsed between preparation and administration of the drug | 15 (5.2)              | 15 (8.2)                     | 10 (5.1)                     | *0.0070        |
| Tube obstruction                                                | 39 (41.1)             | 33 (57.9)                    | 10 (9.6)                     | **0.0010       |
| Compromising of bio-pharmaceutical aspects during crushing      | 11(11.6)              | 7(12.3)                      | 0 (0)                        | **0.0010       |

\*Kruskal-Wallis; \*\*Chisq
